# Supplementary material for: Comprehensive analysis of iron utilization by Mycobacterium tuberculosis
Source: PubMed Central journal article supplement (PMC7058343; doi:10.1371/journal.ppat.1008337), 2020-02-18
Supplement: ppat.1008337.s007.pdf [file ppat.1008337.s007.pdf]

| Strain                                      | Relevant genotypes and description                                                                                                                                                                                 | Source or reference |
|---------------------------------------------|--------------------------------------------------------------------------------------------------------------------------------------------------------------------------------------------------------------------|---------------------|
| <i>E. coli</i> DH5 $\alpha$                 | <i>recA1</i> ; <i>endA1</i> ; <i>gyrA96</i> ; <i>thi</i> ; <i>relA1</i> ; <i>hsdR17</i> ( <i>rK</i> -; <i>mK</i> +); <i>supE44</i> ; $\phi 80\Delta$ <i>lacZ</i> $\Delta$ M15; $\Delta$ <i>lacZYA-argF</i> ; UE169 | [2]                 |
| <i>M. tuberculosis</i> mc <sup>2</sup> 6230 | H37Rv derivative; $\Delta$ RD1 $\Delta$ <i>panCD</i> ; avirulent                                                                                                                                                   | [3]                 |
| <i>M. tuberculosis</i> mc <sup>2</sup> 6206 | H37Rv derivative; $\Delta$ <i>leuCD</i> $\Delta$ <i>panCD</i> ; avirulent                                                                                                                                          | [4]                 |
| <i>M. tuberculosis</i> ML2256               | mc <sup>2</sup> 6230 derivative; $\Delta$ <i>rv2047c::hyg</i> <sup>R</sup> ( <i>rv2047c</i> deletion)                                                                                                              | This study          |
| <i>M. tuberculosis</i> ML2257               | mc <sup>2</sup> 6230 derivative; $\Delta$ <i>rv2047c::hyg</i> <sup>R</sup> , L5 attB::pML4211 ( <i>P</i> <sub><i>imyc</i></sub> :: <i>rv2047c</i> ), <i>kan</i> <sup>R</sup>                                       | This study          |
| <i>M. tuberculosis</i> ML2300               | mc <sup>2</sup> 6230 derivative; $\Delta$ <i>mmpL4::loxP</i>                                                                                                                                                       | #                   |
| <i>M. tuberculosis</i> ML2301               | mc <sup>2</sup> 6230 derivative; $\Delta$ <i>mmpL5::loxP</i>                                                                                                                                                       | #                   |
| <i>M. tuberculosis</i> ML2302               | mc <sup>2</sup> 6230 derivative; $\Delta$ <i>mmpL4::loxP</i> , $\Delta$ <i>mmpL5::loxP</i>                                                                                                                         | #                   |
| <i>M. tuberculosis</i> ML859                | mc <sup>2</sup> 6230 derivative; $\Delta$ <i>mmpS4::loxP</i> , $\Delta$ <i>mmpS5::loxP</i>                                                                                                                         | [5]                 |
| <i>M. tuberculosis</i> ML2277               | mc <sup>2</sup> 6206 derivative; $\Delta$ <i>smtB-zur::hyg</i> <sup>R</sup> ( <i>rv2358-rv2359</i> deletion)                                                                                                       | This study          |
| <i>M. tuberculosis</i> ML2278               | mc <sup>2</sup> 6206 derivative; $\Delta$ <i>smtB-zur::hyg</i> <sup>R</sup> , L5 attB::pML4218 ( <i>P</i> <sub><i>smtB</i></sub> :: <i>smtB</i> ), <i>kan</i> <sup>R</sup>                                         | This study          |
| <i>M. tuberculosis</i> ML2279               | mc <sup>2</sup> 6206 derivative; $\Delta$ <i>smtB-zur::hyg</i> <sup>R</sup> , L5 attB::pML4219 ( <i>P</i> <sub><i>imyc</i></sub> :: <i>zur</i> ), <i>kan</i> <sup>R</sup>                                          | This study          |
| <i>M. tuberculosis</i> ML2280               | mc <sup>2</sup> 6206 derivative; $\Delta$ <i>smtB-zur::hyg</i> <sup>R</sup> , L5 attB::pML4220 ( <i>P</i> <sub><i>smtB</i></sub> :: <i>smtB-zur</i> ), <i>kan</i> <sup>R</sup>                                     | This study          |
| <i>M. tuberculosis</i> ML1600               | mc <sup>2</sup> 6230 derivative; $\Delta$ <i>mbtD::hyg</i> <sup>R</sup> ( <i>rv2381c</i> deletion)                                                                                                                 | [6]                 |

**S1 Table. Bacterial strains used in this work.**

The annotations *hyg*<sup>R</sup> and *kan*<sup>R</sup> indicate that the strain is resistant to the antibiotics hygromycin and kanamycin, respectively. Mutant strains were constructed using either Mtb mc<sup>2</sup>6230 strain or mc<sup>2</sup>6206 strain as parent strains as indicated.

#: The construction of these strains will be published elsewhere.
