# Supplementary material for: Comprehensive analysis of iron utilization by Mycobacterium tuberculosis
Source: PubMed Central journal article supplement (PMC7058343; doi:10.1371/journal.ppat.1008337), 2020-02-18
Supplement: ppat.1008337.s008.pdf [file ppat.1008337.s008.pdf]

| Oligo-nucleotide | Sequence (5' to 3')                                                                                                    | Use                     |
|------------------|------------------------------------------------------------------------------------------------------------------------|-------------------------|
| Adapter1         | CG <b>ACCACGACCAAACCAAG</b> (3' C6-TFA-amino modification)                                                             | Adapter ligation        |
| Adapter2.x       | <b>3' end of Adaptor-primer</b> <u>Index</u> <b>Reverse complement of Adapter1</b>                                     | Adapter ligation        |
| Adapter2.1       | <b>AGTCTCGCAGATGATAAAGG</b> <u>AGACAAGAG</u> <b>CTTGGTTTGGTCGTGGT</b>                                                  | Adapter ligation        |
| Adapter2.2       | <b>AGTCTCGCAGATGATAAAGG</b> <u>TCACAACCTC</u> <b>CTTGGTTTGGTCGTGGT</b>                                                 | Adapter ligation        |
| Adapter2.3       | <b>AGTCTCGCAGATGATAAAGG</b> <u>ACAGTACCT</u> <b>CTTGGTTTGGTCGTGGT</b>                                                  | Adapter ligation        |
| Adapter-primer   | GTCC <b>AGTCTCGCAGATGATAAAGG</b>                                                                                       | Junctions amplification |
| Trans1-r         | CCCGAAAAGTGCCACCTAAATTGTAAGCG                                                                                          | Junctions amplification |
| Trans2-f         | CGCCTTCTATCGCCTTCTTGACGAG                                                                                              | Junctions amplification |
| Nest-1-f         | AATGATACGGCGACCACCGAGATCTACACTCTTTCCCTACACGACGCTCTTCCGATCTCGGGGACTTATCAGCCAACC                                         | Hemi-nested PCR         |
| Nest-2.x-r       | <b>Illumina PCR Primer 2.0</b> <u>Sample Index</u> <b>Illumina Read 2 Sequencing Primer</b> <b>Nest-Adaptor primer</b> | Hemi-nested PCR         |
| Nest-2.1-r       | CAAGCAGAAGACGGCATAACGAGAT <u>AAGTAGAG</u> GTGACTGGAGTTCAGACGTGTGCTCTTCCGATCTGTCA <b>AGTCTCGCAGATGATAAAGG</b>           | Hemi-nested PCR         |
| Nest-2.2-r       | CAAGCAGAAGACGGCATAACGAGAT <u>ACACGATC</u> GTGACTGGAGTTCAGACGTGTGCTCTTCCGATCTGTCA <b>AGTCTCGCAGATGATAAAGG</b>           | Hemi-nested PCR         |
| Nest-2.3-r       | CAAGCAGAAGACGGCATAACGAGAT <u>CATGATCG</u> GTGACTGGAGTTCAGACGTGTGCTCTTCCGATCTGTCA <b>AGTCTCGCAGATGATAAAGG</b>           | Hemi-nested PCR         |
| Nest-2.4-r       | CAAGCAGAAGACGGCATAACGAGAT <u>ATCACGAC</u> GTGACTGGAGTTCAGACGTGTGCTCTTCCGATCTGTCA <b>AGTCTCGCAGATGATAAAGG</b>           | Hemi-nested PCR         |
| Nest-2.5-r       | CAAGCAGAAGACGGCATAACGAGAT <u>ACAGTGGT</u> GTGACTGGAGTTCAGACGTGTGCTCTTCCGATCTGTCA <b>AGTCTCGCAGATGATAAAGG</b>           | Hemi-nested PCR         |
| Nest-2.6-r       | CAAGCAGAAGACGGCATAACGAGAT <u>GAGACACA</u> GTGACTGGAGTTCAGACGTGTGCTCTTCCGATCTGTCA <b>AGTCTCGCAGATGATAAAGG</b>           | Hemi-nested PCR         |
| Nest-2.7-r       | CAAGCAGAAGACGGCATAACGAGAT <u>TGTGACCA</u> GTGACTGGAGTTCAGACGTGTGCTCTTCCGATCTGTCA <b>AGTCTCGCAGATGATAAAGG</b>           | Hemi-nested PCR         |
| Nest-2.8-r       | CAAGCAGAAGACGGCATAACGAGAT <u>TGTTCTAG</u> GTGACTGGAGTTCAGACGTGTGCTCTTCCGATCTGTCA <b>AGTCTCGCAGATGATAAAGG</b>           | Hemi-nested PCR         |

**S2 Table. Oligonucleotides used in this work for DNA sequencing**

Indices are underlined.
