# Supplementary material for: Comprehensive analysis of iron utilization by Mycobacterium tuberculosis
Source: PubMed Central journal article supplement (PMC7058343; doi:10.1371/journal.ppat.1008337), 2020-02-18
Supplement: ppat.1008337.s009.pdf [file ppat.1008337.s009.pdf]

| Oligonucleotide | Sequence (5' to 3')                                                | Use                           |
|-----------------|--------------------------------------------------------------------|-------------------------------|
| 2047-UP-f       | AGAGATA <u>ACTAGT</u> CTGCTGCAACGCCTGGAAG                          | Gene deletion, PCR validation |
| 2047-UP-r       | CTCTCAATTTAAATACCACATCCGCACCTGTCAT                                 | Gene deletion                 |
| 2047-DN-f       | CACACTTAATTA <u>AGAAGCGAT</u> CTCAGTCGCTGA                         | Gene deletion                 |
| 2047-DN-r       | ATATATATGCATGGTGCCTCGTGCATAGAC                                     | Gene deletion, PCR validation |
| smtB-UP-f       | AGAGATA <u>ACTAGT</u> GTTTCACGAAGATGCCCTGC                         | Gene deletion, PCR validation |
| smtB-UP-r       | CTCTCAATTTAAATGTTGAGGGGGACGTCACCAT                                 | Gene deletion                 |
| zur-DN-f        | CACACTTAATTA <u>ACTCAGACT</u> GCCGGAGCTAG                          | Gene deletion                 |
| zur-DN-r        | ATATATATGCATGACCTCTTCCTGCGGACCTC                                   | Gene deletion, PCR validation |
| 2047-inner-f    | GAGACCATCGACGATTTGCA                                               | PCR validation                |
| zur-inner-f     | AACATCGGTCTGACCACCGT                                               | PCR validation                |
| gfp-r           | TCACCGTCCAGCTCGACCAGGAT                                            | PCR validation                |
| hyg-f           | CCTTCACCTTCCTGCACGACTTC                                            | PCR validation                |
| rv2047-EcoR-f   | AGAGGAATTC <u>T</u> TAATTAACAGAAAGGAGGTTAATAGTGAGAATC<br>GCCGTCACC | Expression                    |
| rv2047-Kpn-r    | ATATGGTACCAAGCTTTCAGCGACTGAGATCGCTTC                               | Expression                    |
| smtBup-Eco-f    | ATAGGAATTCCTAGCGGACCATAGTCCCAC                                     | Expression                    |
| smtB-Kpn-r      | AGATGGTACCCACTCATATTGCGTCCTCAC                                     | Expression                    |
| zur-Eco-f       | AGAGGAATTCAGAAAGGAGGTTAATAATGAGTGCAGCCGGTGT<br>C                   | Expression                    |
| zur-Kpn-r       | ATATAGGTACCCCTAGCTCCGGCAGTCTGAG                                    | Expression                    |

**S3 Table. Oligonucleotides used in this work for construction of *M. tuberculosis* deletion mutants and for cloning of expression vectors.**

Restriction sites are underlined.
