# Supplementary material for: Comprehensive analysis of iron utilization by Mycobacterium tuberculosis
Source: PubMed Central journal article supplement (PMC7058343; doi:10.1371/journal.ppat.1008337), 2020-02-18
Supplement: ppat.1008337.s010.pdf [file ppat.1008337.s010.pdf]

| Plasmid    | Components and properties                                                                                                                                                                          | Source or reference |
|------------|----------------------------------------------------------------------------------------------------------------------------------------------------------------------------------------------------|---------------------|
| ΦMycoMarT7 | <i>Himar1</i> transposon, <i>kan<sup>R</sup></i>                                                                                                                                                   | [7]                 |
| pML2714    | pUC origin; pAL5000ts; <i>P<sub>hsp60</sub>::cre</i> ; <i>P<sub>imc</sub>::pamcherry1m</i> ; <i>aph</i> ; 7613 bp                                                                                  | [8]                 |
| pML4211    | ColE1 origin; <i>int</i> ; L5 <i>attP</i> ; <i>aph</i> ; <i>P<sub>imyc</sub>::rv2047c</i> ; 7730 bp                                                                                                | This study          |
| pML4218    | ColE1 origin; <i>int</i> ; L5 <i>attP</i> ; <i>aph</i> ; <i>P<sub>smtB</sub>::smtB</i> ; 5753 bp                                                                                                   | This study          |
| pML4219    | ColE1 origin; <i>int</i> ; L5 <i>attP</i> ; <i>aph</i> ; <i>P<sub>imyc</sub>::zur</i> ; 5550 bp                                                                                                    | This study          |
| pML4220    | ColE1 origin; <i>int</i> ; L5 <i>attP</i> ; <i>aph</i> ; <i>P<sub>smtB</sub>::smtB-zur</i> ; 6142 bp                                                                                               | This study          |
| pML3605    | pML2424-derivative; pUC origin; pAL5000ts; <i>sacR</i> ; <i>sacB</i> ; <i>tdTomato</i> ; up_ <i>rv2047c</i> _hom; <i>loxP-P<sub>smyc</sub>::gfp-hyg-loxP</i> ; down_ <i>rv2047c</i> _hom; 10850 bp | This study          |
| pML3606    | pUC origin; pAL5000ts; <i>sacR</i> ; <i>sacB</i> ; <i>tdTomato</i> ; up_ <i>smtB</i> _hom; <i>loxP-P<sub>smyc</sub>::gfp-hyg-loxP</i> ; down_ <i>zur</i> _hom; 11127 bp                            | This study          |
| pML3001    | pUC origin; pAL5000ts; <i>sacR</i> ; <i>sacB</i> ; <i>tdTomato</i> ; up_ <i>mmpL4</i> _hom; <i>loxP-P<sub>smyc</sub>::gfp-hyg-loxP</i> ; down_ <i>mmpL4</i> _hom; 11579 bp                         | *                   |
| pML3003    | pUC origin; pAL5000ts; <i>sacR</i> ; <i>sacB</i> ; <i>tdTomato</i> ; up_ <i>mmpL5</i> _hom; <i>loxP-P<sub>smyc</sub>::gfp-hyg-loxP</i> ; down_ <i>mmpL5</i> _hom; 11472 bp                         | *                   |

#### S4 Table. Plasmids used in this work.

Up- and downstream homologous sequences of genes are subscripted as up and down. “Origin” denotes origin of replication. The genes *hyg* and *aph* confer resistance to hygromycin and kanamycin, respectively.

\* The construction of these plasmids will be published elsewhere.
