# Supplementary material for: Comprehensive analysis of iron utilization by Mycobacterium tuberculosis
Source: PubMed Central journal article supplement (PMC7058343; doi:10.1371/journal.ppat.1008337), 2020-02-18
Supplement: ppat.1008337.s011.pdf [file ppat.1008337.s011.pdf]

| Library           | Medium<br>(Iron-free 7H9 agar,<br>Tyloxapol, Kan) | Mapped<br>reads  | Template<br>counts | NZmean      | #TA<br>sites hit | Density<br>(%) | NCBI BioSample<br>accession no. |
|-------------------|---------------------------------------------------|------------------|--------------------|-------------|------------------|----------------|---------------------------------|
| Fe-cMBT_rep1*     | 500 ng/ml Fe-cMBT                                 | 9,652,517        | 697,522            | 12.3        | 56,724           | 76.2           | SAMN12913093                    |
| Fe-cMBT_rep2      | 500 ng/ml Fe-cMBT                                 | 2,305,805        | 283,558            | 5.7         | 49,620           | 66.7           | SAMN12913094                    |
| High Fe-MBT_rep1* | 250 ng/ml Fe-MBT                                  | 8,993,212        | 764,055            | 13.8        | 55,351           | 74.4           | SAMN12913095                    |
| High Fe-MBT_rep2  | 250 ng/ml Fe-MBT                                  | 2,231,988        | 393,946            | 7.9         | 50,169           | 67.4           | SAMN12913096                    |
| High Fe-MBT_rep3  | 250 ng/ml Fe-MBT                                  | 4,173,269        | 538,618            | 10.0        | 53,894           | 72.4           | SAMN12913097                    |
| Low Fe-MBT_rep1*  | 50 ng/ml Fe-MBT                                   | 13,288,416       | 873,980            | 15.8        | 55,381           | 74.4           | SAMN12913098                    |
| Low Fe-MBT_rep2   | 50 ng/ml Fe-MBT                                   | 9,345,606        | 839,566            | 15.0        | 56,018           | 75.3           | SAMN12913099                    |
| Hemin_rep1*       | 20 $\mu$ M hemin                                  | 11,218,510       | 587,959            | 10.8        | 54,654           | 73.4           | SAMN12913100                    |
| Hemin_rep2        | 20 $\mu$ M hemin                                  | 7,952,349        | 676,152            | 12.3        | 55,001           | 73.9           | SAMN12913101                    |
| Hemin_rep3        | 20 $\mu$ M hemin                                  | 6,281,407        | 608,542            | 11.1        | 55,065           | 74.0           | SAMN12913102                    |
| Hemoglobin_rep1*  | 5 $\mu$ M hemoglobin                              | 10,724,437       | 597,622            | 10.6        | 56,181           | 75.5           | SAMN12913103                    |
| Hemoglobin_rep2   | 5 $\mu$ M hemoglobin                              | 8,626,564        | 963,195            | 17.0        | 56,640           | 76.1           | SAMN12913104                    |
| Hemin-MBT_rep1*   | 20 $\mu$ M hemin,<br>250 ng/ml Fe-MBT             | 13,721,967       | 788,621            | 14.0        | 56,230           | 75.6           | SAMN12913105                    |
| Hemin-MBT_rep2    | 20 $\mu$ M hemin,<br>250 ng/ml Fe-MBT             | 10,408,244       | 921,888            | 16.2        | 56,995           | 76.6           | SAMN12913106                    |
| <b>Average</b>    |                                                   | <b>8,494,592</b> | <b>681,087</b>     | <b>12.3</b> | <b>54,851</b>    | <b>73.7</b>    |                                 |

**S5 Table. Statistical analysis of the *M. tuberculosis* transposon libraries used in this work.**

The *Mtb*  $\Delta mbtD::hyg^r$  (ML1600) genome contains 74,410 TA sites. NZmean denotes the average template count at non-zero TA sites. Density denotes the fraction of TA sites with at least one insertion.

\* The data sets were used for HMM analysis.
